# Supplementary material
Source: PubMed Central journal article supplement (PMC4348377)
Supplement: jcbfm2014207x4.pdf [file jcbfm2014207x4.pdf]

## Supplementary Figures and Figure Legends

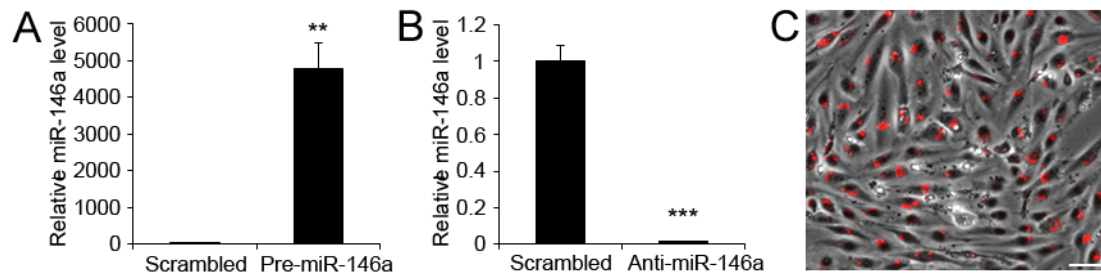

**Supplementary Figure 1.** Over-expression or knock-down of miR-146a in brain endothelium. **(A)** Over-expression of miR-146a in hCMEC/D3 cells via transfection with Pre-miR-146a using siPORT. **(B)** Knock-down of miR-146a in hCMEC/D3 cells via transfection with Anti-miR-146a using lipofectamine 2000. Expression of miR-146a was analysed using Taqman quantitative RT-PCR and normalized to the small nuclear RNA U6B, expressed as relative level to scrambled control. Data represent mean  $\pm$  s.e.m.  $n = 3$ , \*\* $P < 0.01$ , \*\*\* $P < 0.001$  via Student  $t$  test. **(C)** Photomicrograph demonstrating transfection efficiency via Cy3 tagged scrambled Pre-miR. Scale bar, 50  $\mu\text{m}$ .

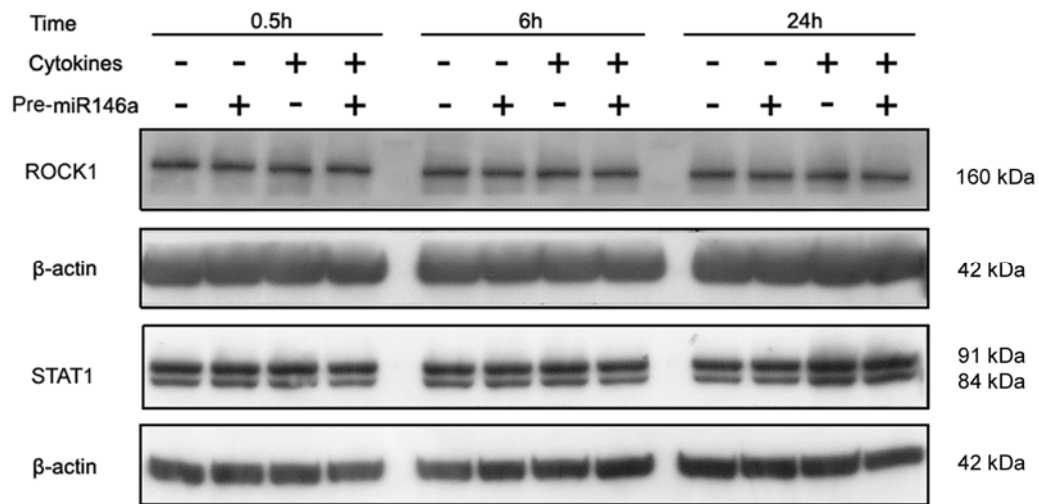

**Supplementary Figure 2.** Two known targets ROCK1 and STAT1 are not affected by miR-146a in brain endothelial cell. Western blot analysis show that over-expression of miR-146a via transfection with Pre-miR-146a did not repress the expression of ROCK1 and STAT1 in hCMEC/D3 cells either unstimulated or stimulated with cytokines (1 ng/ml TNF $\alpha$ /INF $\gamma$ ) for 0.5, 6 and 24 h.

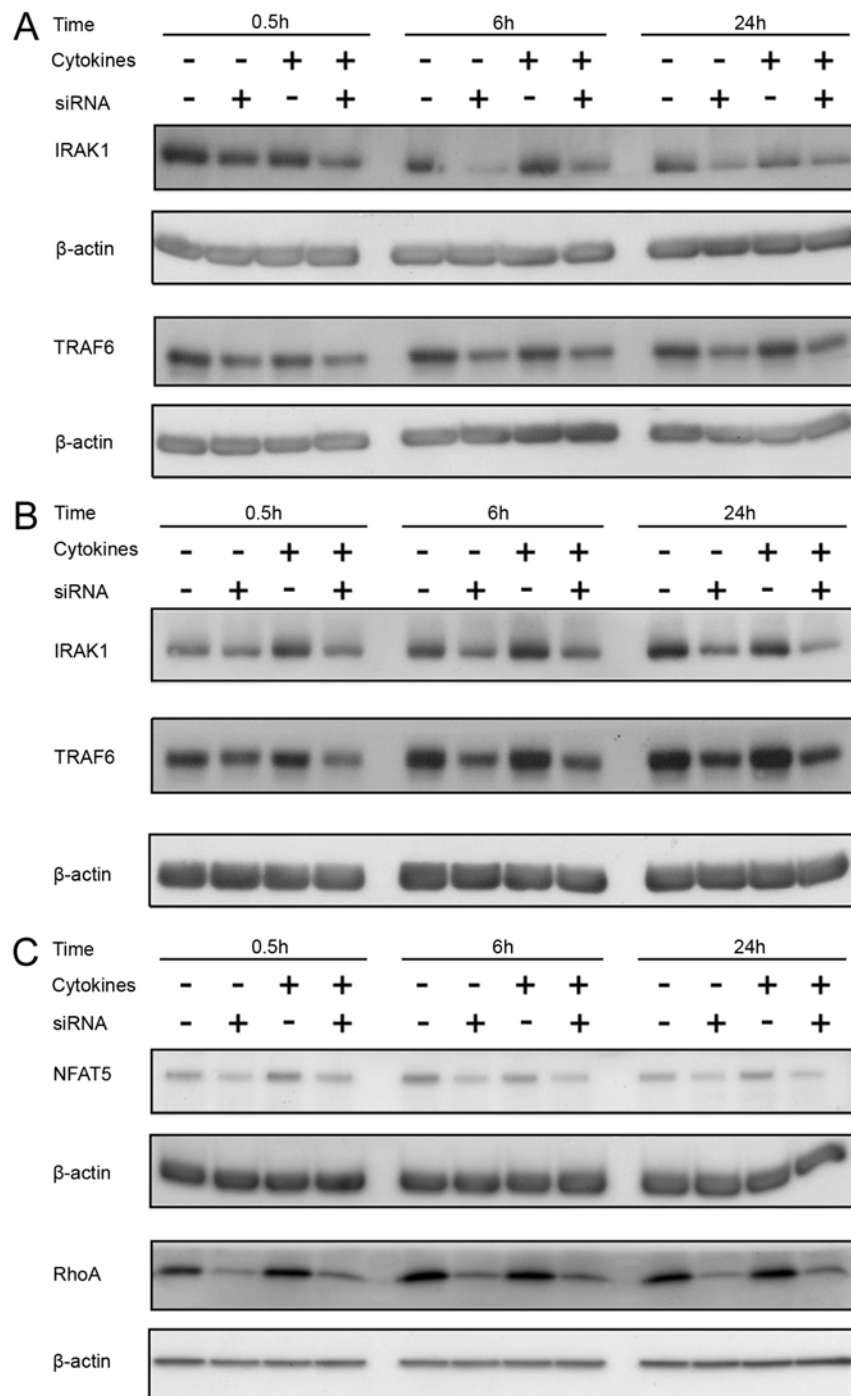

**Supplementary Figure 3.** Small interference RNAs knock-down the expression of IRAK, TRAF6, NFAT5 and RhoA in brain endothelium. **(A)** Western blot analysis show that siIRAK1 or siTRAF6 repressed the expression of IRAK1 and TRAF6 respectively in hCMEC/D3 cells either unstimulated or stimulated with cytokines for 0.5, 6 and 24 h. **(B)** Western blot analysis show that co-transfection of siIRAK1 and siTRAF6 in hCMEC/D3 cells decreased simultaneously the expression of IRAK1 and

TRAF6 in cells untreated or treated with 1 ng/ml TNF $\alpha$ /INF $\gamma$  for 0.5, 6 and 24 h. (C)  
Western blot analysis show that siNFAT5 or siRhoA suppressed the expression of  
NFAT5 and RhoA respectively in hCMEC/D3 cells either non-stimulated or cytokine-  
stimulated for 0.5, 6 and 24 h. siRNA -, siControl; siRNA +, siIRAK1, or siTRAF6,  
or siIRAK1 + siTRAF6, or siNFAT5, or siRhoA.

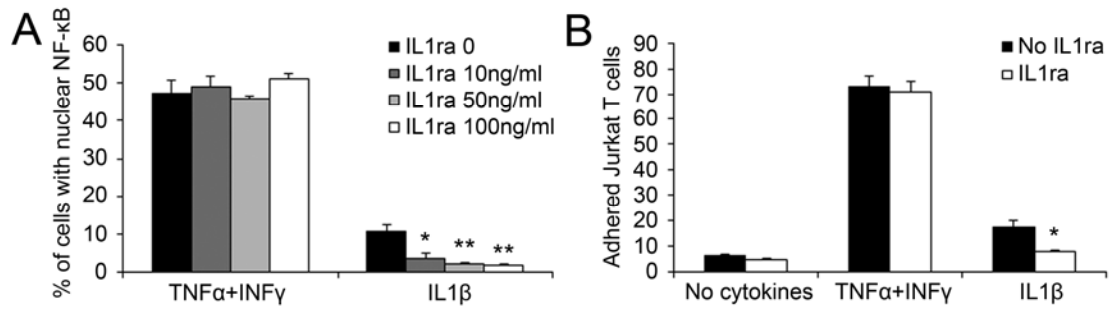

**Supplementary Figure 4.** IL1 receptor antagonist does not inhibit TNF $\alpha$  and INF $\gamma$  induced NF $\kappa$ B activation and leukocyte adhesion. **(A)**, hCMEC/D3 cells were treated with 0-100 ng/ml IL1 receptor antagonist (IL1ra) for 30 min before further treatment with 1 ng/ml TNF $\alpha$ /INF $\gamma$  or 200 pg/ml IL1 $\beta$  for 24 h, subject to immunocytochemistry of NF $\kappa$ B p65. Percentage of cells with nuclear NF $\kappa$ B was analysed. Data represent mean  $\pm$  s.e.m. n = 3, \* $P$  < 0.05, \*\* $P$  < 0.01 compared with that treated with IL1 $\beta$  but untreated with IL1ra via Student  $t$  test. **(B)**, hCMEC/D3 cells in 6-channel slides were treated with 50 ng/ml IL1ra for 30 min, and left untreated or treated with 1 ng/ml TNF $\alpha$ /INF $\gamma$  or IL1 $\beta$  for 24 h, exposed to Jurkat T cells for 5 min at 0.5 dyn/cm<sup>2</sup>. Data represent mean  $\pm$  s.e.m. n = 4, \* $P$  < 0.05 compare with that treated with IL1 $\beta$  but untreated with IL1ra via Student  $t$  test.

### **Supplementary Video Legends:**

miR146a modulates Jurkat T cell adhesion to cytokine-stimulated hCMEC/D3 cells.

hCMEC/D3 cells in 6-channel slides were transfected with scrambled Pre-miR (**Video. A and B**), or Pre-miR-146a (**Video. C**), and left untreated (**Video. A**) or treated with 1 ng/ml TNF $\alpha$  and IFN $\gamma$  (**Video. B and C**) for 24 h. hCMEC/D3 cells were then exposed to 5-chloromethylfluorescein diacetate (CMFDA)-labelled Jurkat T cells for 5 min at 0.5 dyn/cm<sup>2</sup>. Note that Pre-miR-146a markedly decreased Jurkat T cells adherent to cytokine-activated brain endothelium. Images were recorded at one frame (640 x 480  $\mu\text{m}^2$ /field) per second with an inverted time-lapse fluorescence microscope (Olympus IX70, Tokyo, Japan) by using Image Pro Plus software (Media Cybernetics Inc., Bethesda, USA).
